# Supplementary material for: A multicaloric material as a link between electrocaloric and magnetocaloric refrigeration
Source: PubMed Central journal article supplement (PMC4879550; doi:10.1038/srep26629), 2016-05-25
Supplement: srep26629-s1.pdf [file srep26629-s1.pdf]

## **A multicaloric material as a link between electrocaloric and magnetocaloric refrigeration**

Hana Ursic<sup>1\*</sup>, Vid Bobnar<sup>1</sup>, Barbara Malic<sup>1</sup>, Cene Filipic<sup>1</sup>, Marko Vrabelj<sup>1</sup>, Silvo Drnovsek<sup>1</sup>,  
Younghun Jo<sup>2</sup>, Magdalena Wencka<sup>3</sup>, Zdravko Kutnjak<sup>1</sup>

<sup>1</sup>Jožef Stefan Institute, Jamova cesta 39, 1000 Ljubljana, Slovenia

<sup>2</sup>Spin Engineering Physics Team, Korea Basic Science Institute, Daejeon 34133, Korea

<sup>3</sup>Institute of Molecular Physics, Polish Academy of Sciences, ul. Smoluchowskiego 17, 61-179 Poznań, Poland

\*Contact author: hana.ursic@ijs.si (Hana Uršič)

(+386 51 305 154)

Jozef Stefan Institute, Jamova Cesta 39

Ljubljana, Slovenia, 1000

For the microstructural investigation, the PFN-PMW samples were mounted in epoxy, then ground and polished using standard metallographic techniques. The microstructure was examined with a field-emission scanning electron microscope (FE-SEM, JSM-7600F JEOL Ltd., Tokyo, Japan) at 10 kV (fracture-surface and polished surface) and 15 kV (thermally etched surface). The microstructure of the PFN-PMW is relatively dense, uniform, and consists of micron-sized grains, see Figure S1. No secondary phases could be detected.

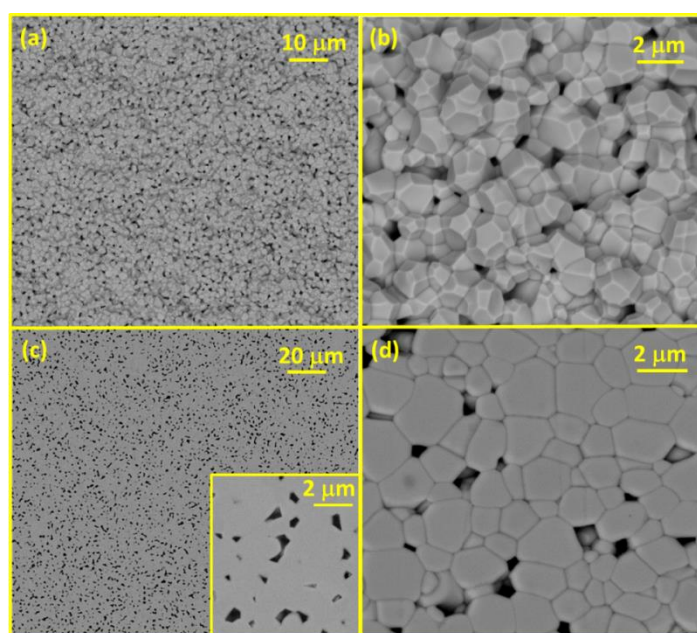

**Figure S1:** FE-SEM micrographs of the (a) and (b) fracture-surface, (c) polished surface and (d) thermally etched surface of the PFN-PMW sample.

The XRD pattern of the PFN-PMW was recorded with a PANalytical X'Pert PRO MPD (PANalytical, Almelo, Netherlands) diffractometer with Cu- $K_{\alpha 1}$  radiation ( $\lambda = 1.54056 \text{ \AA}$ ) in the  $2\theta$ -range from  $10^\circ$  to  $70^\circ$  using a detector with a capture angle of  $2.122^\circ$ . The exposure time for each step was 100 s and the interval between the obtained data points was  $0.034^\circ$ . The XRD pattern revealing reflections of the perovskite phase is shown in Figure S2. No secondary phases were detected, in agreement with the microstructural analysis.

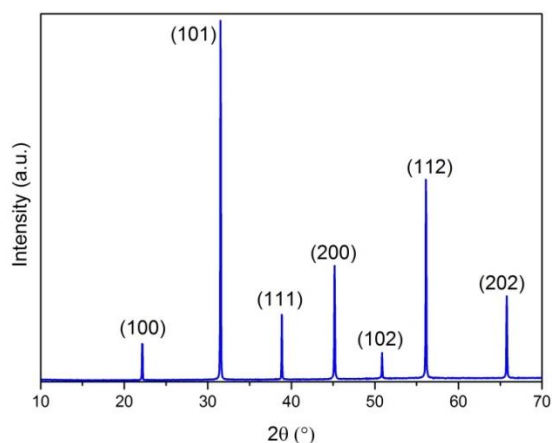

**Figure S2:** Room-temperature XRD pattern of the PFN-PMW sample. The indexed peaks of the perovskite phase are shown in brackets (ICSD 043788).

The complex dielectric constant  $\varepsilon^*(\nu, T) = \varepsilon' - i\varepsilon''$  was measured using an Agilent E4980A Precision LCR meter in the temperature range from 150 K to 310 K at frequencies from 3 Hz to 30 kHz. The amplitude of the probing ac electric signal was 1 V. The temperature was stabilized to within  $\pm 0.01$  K using a lock-in bridge technique with a Pt100 resistor as the thermometer. Figure S3 shows a broad relaxor dispersive maximum in both the real and imaginary parts of the complex dielectric constant with the  $\varepsilon'$  peak at  $\sim 270$  K (for 10 kHz). The polarization-electric field ( $P$ - $E$ ) response was measured on a 200- $\mu\text{m}$ -thick sample at a frequency of 100 Hz using a modified Sawyer-Tower bridge. The result, detected at the applied electric field of 18 kV/cm and at 200 K – a typical ferroelectric hysteresis loop – is shown in Figure S4.

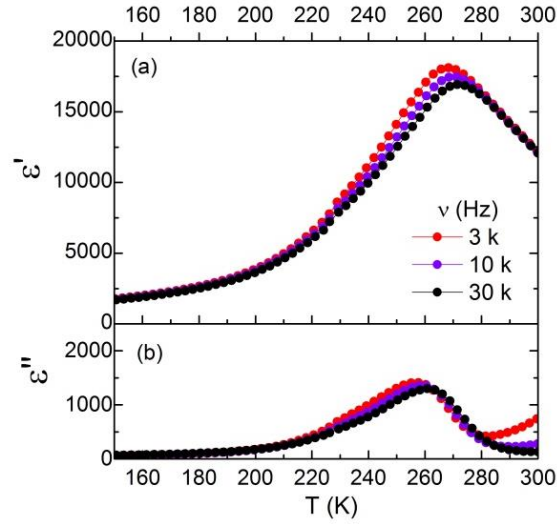

**Figure S3:** Temperature dependence of the (a) real and (b) imaginary parts of  $\epsilon^*$  for the polycrystalline PFN-PMW.

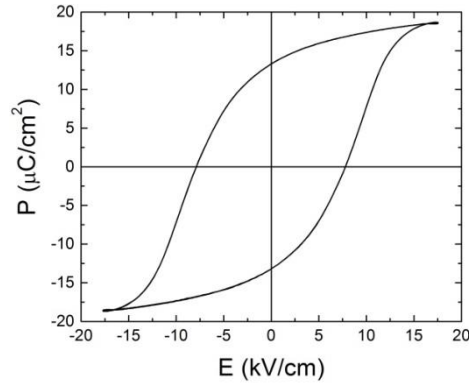

**Figure S4:** Polarization-electric field ( $P$ - $E$ ) response measured at 200 K.

The magnetocaloric and electrocaloric temperature changes were calculated using equations [ref. S1, S2]:

$$(1) \quad \Delta T_{MC} = -\frac{\mu_0 T}{Cp} \int_{H_1}^{H_2} \left( \frac{dM}{dT} \right)_H dH,$$

$$(2) \quad \Delta T_{EC} = -\frac{T}{\rho Cp} \int_{E_1}^{E_2} \left( \frac{dP}{dT} \right)_E dE,$$

where  $\mu_0$  is the magnetic permeability of free space ( $4\pi \cdot 10^{-7} \frac{Vs}{Am}$ ),  $\rho$  is the density and  $Cp$  is the specific heat capacity of the material. The  $Cp$  was measured using a Physical Property

Measurement System. Figure S5 shows the temperature dependence of  $C_p$ , which was used in the calculations.

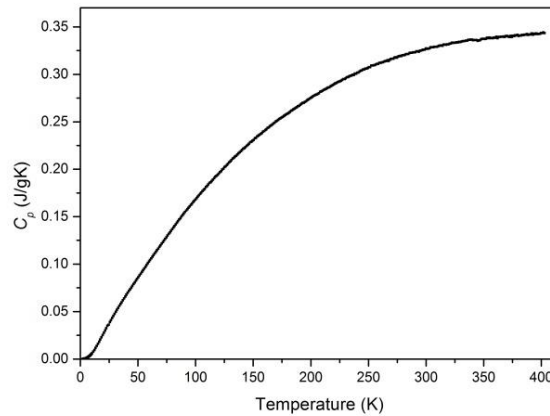

**Figure S5:** Temperature dependence of the  $C_p$  for polycrystalline PFN-PMW.

### Literature

[S1] A. Kitanovski, J. Tušek, U. Tomc, U. Plaznik, M. Ožbolt, A. Poredoš, *Magnetocaloric energy conversion*, ISSN 1865-3529, Springer International Publishing Switzerland, Switzerland, 2015.

[S2] Z. Kutnjak, B. Rožič, R. Pirc, *Electrocaloric effect: theory, measurements, and applications*, Wiley Encyclopedia Of Electrical And Electronics Engineering, John Wiley & Sons, Inc., New Jersey, 2015.
